# Supplementary material for: |Isolation and characterization of novel bacteriophages as a potential therapeutic option for Escherichia coli urinary tract infections
Source: PubMed Central journal article supplement (PMC8285336; doi:10.1007/s00253-021-11432-6), 2021-07-12

**Isolation and characterization of novel bacteriophages as a potential therapeutic option for *Escherichia coli* urinary tract infections**

Edgar González-Villalobos<sup>a,b,c,d</sup>, Rosa María Ribas-Aparicio<sup>a</sup>, Gerardo Erbey Rodea Montealegre<sup>b,c</sup>, Laura Belmont-Monroy<sup>a,b,c</sup>, Yerisaidy Ortega-García<sup>a,b,c</sup>, Gerardo Aparicio-Ozores<sup>a</sup>, José Luis Balcázar<sup>d,e</sup>, Carlos Alberto Eslava-Campos<sup>b,c</sup>, Ulises Hernández-Chiñas<sup>b,c</sup>, José Molina-López<sup>b,c\*</sup>

<sup>a</sup> Departamento de Microbiología, Escuela Nacional de Ciencias Biológicas (ENCB), Instituto Politécnico Nacional (IPN). Prolongación de Carpio y Plan de Ayala s/n, Colonia Santo Tomás, C.P. 11340, Mexico City, Mexico.

<sup>b</sup> Unidad Periférica de Investigación Básica y Clínica en Enfermedades Infecciosas; Departamento de Salud Pública/División de Investigación, Facultad de Medicina, UNAM, C.P. 04510. Mexico City, Mexico.

<sup>c</sup> Laboratorio de Patogenicidad Bacteriana, Unidad de Hemato-Oncología e Investigación. Hospital Infantil de México Federico Gómez/Facultad de Medicina UNAM, C.P. 06720 Mexico City, Mexico.

<sup>d</sup> Catalan Institute for Water Research (ICRA). Girona 17003, Spain.

<sup>e</sup> University of Girona. Girona 17004, Spain.

\*Corresponding author:

Dr. José Molina-López

Phone: +52 55 52 28 99 17.

E-mail: joseml@unam.mx

## Supplementary material

**Supplementary Table S1.** Mass spectrometry data from  $\phi$ Ec3 and  $\phi$ Ec4 phages. In both cases, similar proteins were detected by mass spectrometry. ID denotes the reference of the identified proteins. M/Z indicates the mass-charge ratio. Peptide refers to a protein sequence.

| ID                  | Coverage | M/Z      | Peptide               |
|---------------------|----------|----------|-----------------------|
| RNA2<br>polyprotein | 6.5%     | 871.257  | DMISDFK               |
|                     |          | 887.239  | ISTSVAPGR             |
|                     |          | 1364.076 | WITAGLVMPTFK          |
|                     |          | 1758.347 | ISTSVAPGRAQWISER      |
|                     |          | 1792.164 | MFSWKWGSGPIDNPEK      |
|                     |          | 2383.480 | ITASADPVYTLSVPHWLIHHK |
| Endolysin           | 19.0%    | 862.116  | QAEDMLR               |
|                     |          | 1046.608 | SGDNLTKIAK            |
|                     |          | 1347.711 | SGDTLSKIAVDNK         |
|                     |          | 2086.956 | QISQAGINLIKSFEGLQLK   |

**Supplementary Fig. S1.** Analysis of  $\phi$ Ec3 and  $\phi$ Ec4 protein profiles (15% SDS-PAGE with silver staining).  $\phi$ Ec3, two proteins of 37 kDa and 11 kDa were identified.  $\phi$ Ec4, two proteins of 37 kDa and 13 kDa were identified.

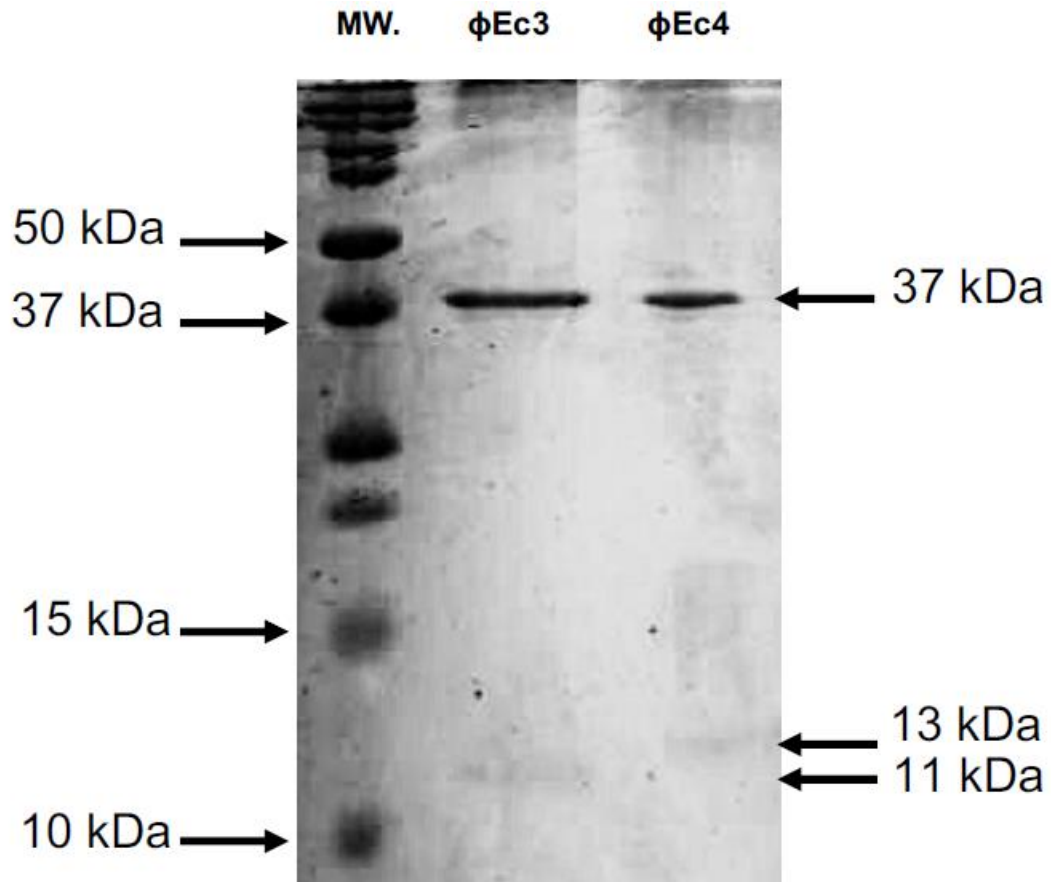

Supplement: 253_2021_11432_MOESM1_ESM.pdf [file 253_2021_11432_MOESM1_ESM.pdf]
